# Supplementary material
Source: PubMed Central journal article supplement (PMC6650736)
Supplement: ba026591-suppl1.pdf [file ba026591-suppl1.pdf]

## **IgA levels at diagnosis predict for infections, time to treatment, and survival in chronic lymphocytic leukemia.**

Ganchimeg Ishdorj,<sup>1\*</sup> Erin Streu,<sup>2\*</sup> Pascal Lambert,<sup>3</sup> Dhali Dhaliwal,<sup>4</sup> Salaheddin M. Mahmud,<sup>6,7</sup> Spencer B. Gibson,<sup>1,8,9</sup> Versha Banerji,<sup>1,4</sup> Aaron J. Marshall<sup>9</sup> and James B. Johnston<sup>1,4</sup>

<sup>1</sup>Research Institute in Oncology and Hematology (formerly Manitoba Institute of Cell Biology), CancerCare Manitoba Winnipeg, Manitoba, Canada

<sup>2</sup>Department of Nursing, CancerCare Manitoba Winnipeg, Manitoba, Canada

<sup>3</sup>Department of Epidemiology, CancerCare Manitoba Winnipeg, Manitoba, Canada

<sup>4</sup>Section of Haematology/Oncology, Department of Internal Medicine, University of Manitoba Winnipeg, Manitoba, Canada

<sup>5</sup>Department of Community Health Sciences, University of Manitoba, Winnipeg, Manitoba, Canada

<sup>6</sup>Vaccine and Drug Evaluation Centre, University of Manitoba, Winnipeg, Manitoba, Canada

<sup>7</sup>College of Pharmacy, University of Manitoba, Winnipeg, Manitoba, Canada

<sup>8</sup>Department of Biochemistry and Medical Genetics, University of Manitoba Winnipeg, Manitoba, Canada

<sup>9</sup>Department of Immunology, University of Manitoba

\*G.I. and E.S. contributed equally to this work

**Correspondence to:** James B. Johnston, MB, BAO, FRCP(C), Section of Hematology/Oncology, Department of Internal Medicine, University of Manitoba, CancerCare Manitoba, 675, McDermot Avenue, Winnipeg, Manitoba, Canada.

Phone : (204) 787-2161

Fax : (204) 787-2190

E-mail: [james.johnston@cancercare.mb.ca](mailto:james.johnston@cancercare.mb.ca)

**Short title:** Immunoglobulin subtypes and CLL

**Supplementary Table 1. Competing risk regression predicting treatment of CLL/SLL**

| Variables                          |                      | Unimputed model |                    |         |               |              |         | Imputed model |              |         |               |                     |         |
|------------------------------------|----------------------|-----------------|--------------------|---------|---------------|--------------|---------|---------------|--------------|---------|---------------|---------------------|---------|
|                                    |                      | Univariable     |                    |         | Multivariable |              |         | Univariable   |              |         | Multivariable |                     |         |
|                                    |                      | SHR             | CI, 95%            | P value | SHR           | CI, 95%      | P value | SHR           | CI, 95%      | P value | SHR           | CI, 95%             | P value |
| <b>IgG</b>                         | *IgG <sup>0.5</sup>  | 3.05            | 1.34 - 6.96        | <0.001  |               |              |         | 2.19          | 1.42 - 3.37  | 0.001   |               |                     |         |
|                                    | IgG <sup>-1</sup>    | 1.69            | 1.30 - 2.20        |         |               |              |         | 1.16          | 0.98 - 1.38  |         |               |                     |         |
| <b>IgA</b>                         | **IgA <sup>0.5</sup> | <b>0.13</b>     | <b>0.07 - 0.22</b> | <0.001  | 0.56          | 0.29 - 1.09  | 0.008   | 0.18          | 0.10 - 0.32  | <0.001  | 0.34          | <b>0.18 - 0.64</b>  | 0.001   |
|                                    | IgA <sup>2</sup>     | 1.16            | 1.11 - 1.21        |         | 1.07          | 1.02 - 1.12  |         | 1.13          | 1.08 - 1.19  |         | 1.09          | 1.04 - 1.14         |         |
| <b>IgM</b>                         | IgM <sup>-1</sup>    | 1.07            | 1.03 - 1.12        | 0.001   | 1.05          | 1.00 - 1.11  | 0.036   | 1.07          | 1.03 - 1.11  | 0.001   |               |                     |         |
| <b>Gender</b>                      | Female               | 0.97            | 0.77 - 1.21        | 0.764   |               |              |         | 0.97          | 0.77 - 1.21  | 0.764   |               |                     |         |
|                                    | Male                 | 1               |                    |         | 1             |              |         |               |              |         |               |                     |         |
| <b>CIRS</b>                        | Continuous           | 1.05            | 1.01 - 1.09        | 0.010   |               |              |         | 1.05          | 1.01 - 1.09  | 0.010   |               |                     |         |
| <b>Age</b>                         | Continuous           | 0.99            | 0.99 - 1.00        | 0.266   |               |              |         | 0.99          | 0.99 - 1.00  | 0.266   |               |                     |         |
| <b>CD38</b>                        | Missing              | 1.32            | 0.94 - 1.86        | <0.001  | 0.96          | 0.60 - 1.54  | 0.004   |               |              | <0.001  |               |                     |         |
|                                    | Positive             | 2.55            | 1.99 - 3.27        |         | 1.70          | 1.23 - 2.36  |         | 2.43          | 1.89 - 3.11  |         |               |                     |         |
|                                    | Negative             | 1               |                    |         | 1             |              |         | 1             |              |         |               |                     |         |
| <b>ZAP-70</b>                      | Missing              | 1.37            | 1.00 - 1.88        | <0.001  |               |              |         |               |              | <0.001  |               |                     |         |
|                                    | Positive             | 2.23            | 1.74 - 2.86        |         |               |              | 2.15    | 1.67 - 2.77   |              |         |               |                     |         |
|                                    | Negative             | 1               |                    |         | 1             |              |         |               |              |         |               |                     |         |
| <b>IGHV gene</b>                   | No result            | 0.86            | 0.45 - 1.66        | 0.046   |               |              |         |               |              | 0.153   |               |                     |         |
|                                    | VH6                  | 0.72            | 0.23 - 2.26        |         |               |              | 0.87    | 0.25 - 2.97   |              |         |               |                     |         |
|                                    | VH5                  | 1.08            | 0.48 - 2.42        |         |               |              | 1.31    | 0.52 - 3.28   |              |         |               |                     |         |
|                                    | VH4                  | 0.93            | 0.46 - 1.91        |         |               |              | 1.07    | 0.49 - 2.37   |              |         |               |                     |         |
|                                    | VH3                  | 0.99            | 0.52 - 1.88        |         |               |              | 1.13    | 0.54 - 2.36   |              |         |               |                     |         |
|                                    | VH2                  | 1               |                    |         |               |              | 1       |               |              |         |               |                     |         |
| <b>IGHV</b>                        | No result            | 1.45            | 1.06 - 1.97        | <0.001  | 1.39          | 0.65 - 2.98  | <0.001  |               |              | <0.001  |               |                     |         |
|                                    | Unmutated            | 3.42            | 2.63 - 4.46        |         | 2.49          | 1.73 - 3.58  |         | 3.52          | 2.70 - 4.60  |         |               |                     |         |
|                                    | Mutated              | 1               |                    |         | 1             |              |         | 1             |              |         |               |                     |         |
| <b>B2M</b>                         | Missing              | 1.73            | 1.23 - 2.44        | <0.001  | 0.75          | 0.41 - 1.37  | 0.004   |               |              | <0.001  |               |                     |         |
|                                    | High                 | 2.49            | 1.92 - 3.23        |         | 1.54          | 1.13 - 2.11  |         | 2.24          | 1.75 - 2.87  |         |               |                     |         |
|                                    | Normal               | 1               |                    |         | 1             |              |         | 1             |              |         |               |                     |         |
| <b>M- band</b>                     | Missing              | 0.93            | 0.71 - 1.22        | 0.281   |               |              |         | 0.93          | 0.71 - 1.22  | 0.281   |               |                     |         |
|                                    | Oligoclonal          | 1.60            | 0.69 - 3.74        |         |               |              | 1.60    | 0.69 - 3.74   |              |         |               |                     |         |
|                                    | Present              | 1.20            | 0.84 - 1.71        |         |               |              | 1.20    | 0.84 - 1.71   |              |         |               |                     |         |
|                                    | Not present          | 1               |                    |         |               |              | 1       |               |              |         |               |                     |         |
| <b>SLL<br/>MBL<br/>CLL, stages</b> |                      | 9.92            | 4.83 - 20.36       | <0.001  | 6.18          | 3.10 - 12.31 | <0.001  | 9.92          | 4.83 - 20.36 | <0.001  | 7.32          | 3.58 - 14.99        | <0.001  |
|                                    | 0                    | 1               |                    |         | 1             |              |         | 1             |              |         |               |                     |         |
|                                    | I-II                 | 3.56            | 1.78 - 7.12        |         | 2.28          | 1.18 - 4.42  |         | 3.56          | 1.78 - 7.12  |         |               |                     |         |
|                                    | III-IV               | 10.79           | 5.41 - 21.51       |         | 5.68          | 2.93 - 11.01 |         | 10.79         | 5.41 - 21.51 |         |               |                     |         |
|                                    |                      | 17.75           | 8.24 - 38.20       |         | 15.60         | 6.46 - 37.70 |         | 17.75         | 8.24 - 38.20 |         | 12.24         | <b>5.50 - 27.25</b> |         |
| <b>Diagnosis Year</b>              | Continuous           | 0.98            | 0.95 - 1.02        | 0.442   |               |              |         | 0.98          | 0.95 - 1.02  | 0.442   |               |                     |         |

\* IgG<sup>-1</sup> and IgG<sup>0.5</sup>, means that IgG was entered as two variables where the one is the power of -1, and the other was to the power of 0.5.

\*\*IgA entered as two variables where one was to the power of 0.5 and the other was to the power of 2.

**Supplementary Table 2. Cox regression predicting overall survival**

| Variables              |             | Unimputed model |              |         |               |             |             | Imputed model |              |         |               |                    |         |
|------------------------|-------------|-----------------|--------------|---------|---------------|-------------|-------------|---------------|--------------|---------|---------------|--------------------|---------|
|                        |             | Univariable     |              |         | Multivariable |             |             | Univariable   |              |         | Multivariable |                    |         |
|                        |             | SHR             | CI, 95%      | P value | SHR           | CI, 95%     | P value     | SHR           | CI, 95%      | P value | SHR           | CI, 95%            | P value |
| <b>IgG</b>             |             | 1.01            | 0.99 - 1.03  | 0.309   |               |             |             | 1.01          | 0.99 - 1.03  | 0.339   |               |                    |         |
| <b>IgA</b>             | *IgA^1      | 0.62            | 0.47 - 0.81  | <0.001  |               |             |             | 0.65          | 0.49 - 0.85  | <0.001  | 0.81          | <b>0.61 - 1.08</b> | 0.026   |
|                        | IgA^3       | 1.03            | 1.02 - 1.04  |         |               |             |             | 1.03          | 1.02 - 1.04  |         | 1.01          | 1.00 - 1.03        |         |
| <b>IgM</b>             |             | 1.04            | 0.98 - 1.10  | 0.202   |               |             |             | 1.03          | 0.97 - 1.10  | 0.332   |               |                    |         |
| <b>Gender</b>          | Female      | 0.67            | 0.49 - 0.92  | 0.013   | 0.55          | 0.39 - 0.76 | <0.001      | 0.67          | 0.49 - 0.92  | 0.013   | 0.52          | 0.38 - 0.73        | <0.001  |
|                        | Male        | 1               |              |         | 1             |             |             | 1             |              |         | 1             |                    |         |
| <b>CIRS</b>            | (CIRS+1)^1  | 1.40            | 1.15 - 1.71  | <0.001  |               |             |             | 1.40          | 1.15 - 1.71  | <0.001  |               |                    |         |
|                        | (CIRS+1)^2  | 0.98            | 0.97 - 1.00  |         |               |             |             | 0.98          | 0.97 - 1.00  |         |               |                    |         |
| <b>Age</b>             | (Age/50)^3  | 1.79            | 1.61 - 2.00  | <0.001  | 1.78          | 1.58 - 2.02 | <0.001      | 1.79          | 1.61 - 2.00  | <0.001  | 1.72          | 1.52 - 1.95        | <0.001  |
| <b>CD38</b>            | Missing     | 2.24            | 1.53 - 3.28  | <0.001  | 1.83          | 1.18 - 2.83 | 0.023       |               |              |         |               |                    |         |
|                        | Positive    | 1.91            | 1.36 - 2.67  |         | 1.30          | 0.90 - 1.88 |             | 1.86          | 1.33 - 2.59  | <0.001  |               |                    |         |
|                        | Negative    | 1               |              |         | 1             |             |             | 1             |              |         |               |                    |         |
| <b>ZAP-70</b>          | Missing     | 2.20            | 1.56 - 3.10  | <0.001  | 1.71          | 1.15 - 2.53 | 0.001       |               |              |         |               |                    |         |
|                        | Positive    | 1.19            | 0.82 - 1.73  |         | 0.73          | 0.49 - 1.09 |             | 1.17          | 0.81 - 1.68  | 0.403   |               |                    |         |
|                        | Negative    | 1               |              |         | 1             |             |             | 1             |              |         |               |                    |         |
| <b>IGHV gene</b>       | No result   | 5.25            | 1.29 - 21.34 | <0.001  |               |             |             |               |              |         |               |                    |         |
|                        | VH6         | 2.04            | 0.34 - 12.19 |         |               |             |             | 1.67          | 0.28 - 10.02 | 0.786   |               |                    |         |
|                        | VH5         | 1.94            | 0.38 - 10.01 |         |               |             |             | 1.66          | 0.33 - 8.39  |         |               |                    |         |
|                        | VH4         | 2.22            | 0.50 - 9.75  |         |               |             |             | 2.01          | 0.47 - 8.50  |         |               |                    |         |
|                        | VH3         | 2.41            | 0.59 - 9.89  |         |               |             |             | 2.28          | 0.59 - 8.75  |         |               |                    |         |
|                        | VH2         | 1               |              |         |               |             |             | 1             |              |         |               |                    |         |
| VH1                    | 2.97        | 0.71 - 12.46    |              |         |               | 2.51        | 0.66 - 9.60 |               |              |         |               |                    |         |
| <b>IGHV</b>            | No result   | 2.97            | 2.05 - 4.31  | <0.001  |               |             |             |               |              |         |               |                    |         |
|                        | Unmutated   | 1.86            | 1.25 - 2.76  |         |               |             |             | 1.93          | 1.31 - 2.86  | 0.001   |               |                    |         |
|                        | Mutated     | 1               |              |         |               |             |             | 1             |              |         |               |                    |         |
| <b>B2M</b>             | Missing     | 3.06            | 1.70 - 5.51  | <0.001  | 1.85          | 1.01 - 3.40 | <0.001      |               |              |         |               |                    |         |
|                        | High        | 6.79            | 4.14 - 11.11 |         | 3.07          | 1.84 - 5.12 |             | 5.59          | 3.50 - 8.93  | <0.001  | 3.01          | 1.84 - 4.92        | <0.001  |
|                        | Low-normal  | 1               |              |         | 1             |             |             | 1             |              |         | 1             |                    |         |
| <b>M-band</b>          | Missing     | 1.01            | 0.70 - 1.47  | 0.005   |               |             |             | 1.01          | 0.70 - 1.47  | 0.005   |               |                    |         |
|                        | Oligoclonal | 2.19            | 0.98 - 4.87  |         |               |             |             | 2.19          | 0.98 - 4.87  |         |               |                    |         |
|                        | Present     | 1.76            | 1.15 - 2.68  |         |               |             |             | 1.76          | 1.15 - 2.68  |         |               |                    |         |
|                        | Not present | 1               |              |         |               |             |             | 1             |              |         |               |                    |         |
| <b>CLL, stages</b>     | <b>SLL</b>  | 2.01            | 0.99 - 4.08  | <0.001  | 1.08          | 0.51 - 2.30 | 0.007       | 2.01          | 0.99 - 4.08  | <0.001  | 1.32          | 0.62 - 2.78        | 0.045   |
|                        | <b>MBL</b>  | 1               |              |         | 1             |             |             | 1             |              |         | 1             |                    |         |
|                        | 0           | 1.33            | 0.70 - 2.53  |         | 1.04          | 0.54 - 2.02 |             | 1.33          | 0.70 - 2.53  |         | 1.03          | 0.53 - 1.99        |         |
|                        | I-II        | 2.29            | 1.20 - 4.37  |         | 1.66          | 0.83 - 3.32 |             | 2.29          | 1.20 - 4.37  |         | 1.50          | 0.75 - 3.00        |         |
|                        | III-IV      | 4.92            | 2.43 - 9.96  |         | 2.38          | 1.12 - 5.10 |             | 4.92          | 2.43 - 9.97  |         | 2.21          | <b>1.03 - 4.78</b> |         |
| <b>IgG replacement</b> | Yes         | 1.13            | 0.55 - 2.33  | 0.738   |               |             |             | 1.13          | 0.55 - 2.33  | 0.738   |               |                    |         |
|                        | No          | 1               |              |         |               |             |             | 1             |              |         |               |                    |         |
| <b>CLL treatment</b>   | Yes         | 3.05            | 2.23 - 4.17  | <0.001  | 1.96          | 1.37 - 2.79 | <0.001      | 3.05          | 2.23 - 4.17  | <0.001  | 1.83          | 1.29 - 2.59        | 0.001   |
|                        | No          | 1               |              |         | 1             |             |             | 1             |              |         | 1             |                    |         |
| <b>Diagnosis year</b>  | Continuous  | 1.02            | 0.96 - 1.08  | 0.540   |               |             |             | 1.02          | 0.96 - 1.08  | 0.540   |               |                    |         |

\*IgA entered as two variables where one was to the power of 1, and the other was to the power of 3.

**Supplementary Table 3. Competing risk regression predicting IgG replacement therapy.**

| Variables                                     |                                     | Unimputed model |             |         |               |             |         | Imputed model |             |         |               |                    |              |
|-----------------------------------------------|-------------------------------------|-----------------|-------------|---------|---------------|-------------|---------|---------------|-------------|---------|---------------|--------------------|--------------|
|                                               |                                     | Univariable     |             |         | Multivariable |             |         | Univariable   |             |         | Multivariable |                    |              |
|                                               |                                     | SHR             | CI, 95%     | P value | SHR           | CI, 95%     | P value | SHR           | CI, 95%     | P value | SHR           | CI, 95%            | P value      |
| <b>IgG</b>                                    | (IgG/10) <sup>-2</sup>              | 2.44            | 1.55 - 3.85 | <0.001  | 2.28          | 1.44 - 3.60 | <0.001  | 2.11          | 1.30 - 3.41 | <0.001  | 1.68          | <b>1.04 - 2.70</b> | <b>0.047</b> |
|                                               | (IgG/10) <sup>-2</sup> * ln(IgG/10) | 1.62            | 1.21 - 2.16 |         | 1.56          | 1.17 - 2.09 |         | 1.50          | 1.10 - 2.04 |         | 1.32          | 0.98 - 1.77        |              |
| <b>IgA</b>                                    |                                     | 0.41            | 0.23 - 0.72 | 0.002   |               |             |         | 0.46          | 0.28 - 0.75 | 0.002   | 0.54          | 0.31 - 0.95        | 0.031        |
| <b>IgM</b>                                    | log(IgM)                            | 0.53            | 0.36 - 0.78 | 0.001   |               |             |         | 0.55          | 0.38 - 0.80 | 0.002   |               |                    |              |
| <b>Gender</b>                                 | Female                              | 0.97            | 0.55 - 1.73 | 0.919   |               |             |         | 0.97          | 0.55 - 1.73 | 0.919   |               |                    |              |
|                                               | Male                                | 1               |             |         | 1             |             |         |               |             |         |               |                    |              |
| <b>CIRS</b>                                   |                                     | 1.19            | 1.10 - 1.29 | <0.001  | 1.22          | 1.11 - 1.35 | <0.001  | 1.19          | 1.10 - 1.29 | <0.001  | 1.24          | 1.14 - 1.36        | <0.001       |
| <b>Age</b>                                    | per 10 years                        | 0.73            | 0.59 - 0.92 | 0.006   | 0.66          | 0.50 - 0.88 | 0.005   | 0.73          | 0.59 - 0.92 | 0.006   | 0.64          | 0.50 - 0.83        | 0.001        |
| <b>CD38</b>                                   | Missing                             | 0.94            | 0.39 - 2.31 | 0.128   |               |             |         | 1.71          | 0.94 - 3.12 | 0.082   |               |                    |              |
|                                               | Positive                            | 1.80            | 0.98 - 3.30 |         | 1             |             |         |               |             |         |               |                    |              |
|                                               | Negative                            | 1               |             |         |               |             |         |               |             |         |               |                    |              |
| <b>ZAP-70</b>                                 | Missing                             | 0.11            | 0.01 - 0.79 | 0.004   |               |             |         | 1.92          | 1.08 - 3.42 | 0.026   |               |                    |              |
|                                               | Positive                            | 1.91            | 1.08 - 3.37 |         | 1             |             |         |               |             |         |               |                    |              |
|                                               | Negative                            | 1               |             |         |               |             |         |               |             |         |               |                    |              |
| <b>IGHV</b>                                   | No result                           | 0.92            | 0.45 - 1.86 | 0.583   |               |             |         | 1.32          | 0.69 - 2.44 | 0.404   |               |                    |              |
|                                               | Unmutated                           | 1.30            | 0.68 - 2.48 |         | 1             |             |         |               |             |         |               |                    |              |
|                                               | Mutated                             | 1               |             |         |               |             |         |               |             |         |               |                    |              |
| <b>B2M</b>                                    | Missing                             | 1.30            | 0.56 - 3.02 | 0.439   |               |             |         | 1.37          | 0.72 - 2.61 | 0.341   |               |                    |              |
|                                               | High                                | 1.57            | 0.79 - 3.13 |         | 1             |             |         |               |             |         |               |                    |              |
|                                               | Low-normal                          | 1               |             |         |               |             |         |               |             |         |               |                    |              |
| <b>SLL</b><br><b>MBL</b><br><b>CLL, stage</b> |                                     | 0.77            | 0.19 - 3.04 | 0.034   |               |             |         | 0.77          | 0.19 - 3.04 | 0.034   |               |                    |              |
|                                               |                                     | 1               |             |         | 1             |             |         |               |             |         |               |                    |              |
|                                               | 0                                   | 0.83            | 0.28 - 2.50 |         | 0.83          | 0.28 - 2.50 |         |               |             |         |               |                    |              |
|                                               | I-II                                | 1.91            | 0.64 - 5.68 |         | 1.91          | 0.64 - 5.68 |         |               |             |         |               |                    |              |
|                                               | III-IV                              | 2.50            | 0.74 - 8.40 |         | 2.50          | 0.74 - 8.40 |         |               |             |         |               |                    |              |
| <b>CLL Treatment</b>                          | Yes                                 | 2.84            | 1.57 - 5.13 | 0.001   | 2.97          | 1.46 - 6.04 | 0.003   | 2.84          | 1.57 - 5.13 | 0.001   | 2.60          | 1.42 - 4.76        | 0.002        |
|                                               | No                                  | 1               |             | 1       |               |             | 1       |               | 1           |         | 1             |                    |              |
